# Supplementary material for: The Mitochondrial Genomes of Aquila fasciata and Buteo lagopus (Aves, Accipitriformes): Sequence, Structure and Phylogenetic Analyses
Source: PLoS One. 2015 Aug 21;10(8):e0136297. doi: 10.1371/journal.pone.0136297 (PMC4546579; doi:10.1371/journal.pone.0136297)
Supplement: S1 Table — (DOC) [file pone.0136297.s001.doc]

**S1 Table. Primers used in amplifying the mitogenomes of *Aquila fasciata* and *Buteo lagopus.***

| No. | Name | Sequences(5’-3’) | Size (bp) | Sources |
| --- | --- | --- | --- | --- |
| 1a | KLACCMTabF1 | TCGGGCTGGTTCTCAATCTC | 20 | This study |
| 1a | KLACCMTabR1 | GGTAGTTGGGTTGGTGTTGG | 20 | This study |
| 1b | KLACCMTF1 | AGCCAACCAGTAGAACACCC | 20 | This study |
| 1b | KLACCMTR1 | GGTGTCTTTGTGGCTCGGTT | 20 | This study |
| 2 a | KLACCMTabF2-1 | CCACCCAAATACACCATAAAC | 21 | This study |
| 2 a | KLACCMTabR2-1 | GGGCTTTGGTAGTATTGCTC | 20 | This study |
| 2 a | KLACCMTabF2-2 | CCCTACCAAACCATGTAACC | 20 | This study |
| 2 a | KLACCMTabF2-3 | CAATACTACCAAAGCCCTAA | 20 | This study |
| 2 a | KLACCMTabR2-2 | GGCTTTAGGCGTATCTTGGG | 20 | This study |
| 2b | KLACCMTblF2-1 | ACCTCTATCACCAACTCCCA | 20 | This study |
| 2b | KLACCMTblR2-1 | GGAATCAAGGGCATTTACAC | 20 | This study |
| 2b | KLACCMTblR2-2 | AGTAAGGAATCAAGGGCA | 18 | This study |
| 2b | KLACCMTblF2-2 | CCGTGAACTTATAACAAAGC | 19 | This study |
| 2b | KLACCMTblR2-3 | TTTAGTTGGTCGTGGGCTGT | 20 | This study |
| 3c | KLPASMTF3 | CCCACGGGTAATCAGCAGT | 19 |  |
| 3c | KLPASMTR3 | ACTCTTTGTTGATGGCTGCT | 20 |  |
| 4 c | KLPASMTF4 | GAGGTGAAAAGCCAATCGAGC | 21 |  |
| 4 c | KLPASMTR4 | GCTAGGGAGAGGATTTGAACC | 21 |  |
| 5c | KLPASMTF5 | AGTCCTACGTGATCTGAGTT | 20 |  |
| 5c | KLPASMTR5 | GGCCCGATAGCTTGTTTAG | 19 |  |
| 6c | KLPASMTF6 | GATAAAGTGAACATAGAGGT | 20 |  |
| 6c | KLPASMTR6 | ATCGAAGCCCATCTGCCTA | 19 |  |
| 6c | KLFALMTR6 | TCAAGGCCCATCTATCTAGGTT | 22 | This study |
| 7c | KLPASMTF7 | GCCTTCAAAGCCTTAAACAA | 20 |  |
| 7c | KLPASMTR7 | ATGGATAGGACGTAGTGGAA | 20 |  |
| 7c | KLFALMTR7 | GTGTAGGCATCTGGGTAG | 18 | This study |
| 8c | KLPASMTF8 | GAATGGACGTAGACACCCG | 19 |  |
| 8c | KLPASMTR8 | CTGGTACATAGCTTCTTAAT | 20 |  |
| 8c | KLFALMTF8 | GATAAAGTGAACATAGAGGT | 20 | This study |
| 8c | KLFALMTR8 | AACCTAGATAGATGGGCCTTGA | 22 | This study |
| 9c | KLFALMTF9 | ATGTTTTCTTGTTAGGTATAGG | 22 | This study |
| 9c | KLFALMTR9 | ATCCTACCAGCAATTGTCCTC | 21 | This study |
| 10c | KLFALMTF10 | ACGTCTTCGTCCTCCTACTAAG | 22 | This study |
| 10c | KLFALMTR10 | GCTTTCTAGGCATAGTAGGGC | 21 | This study |
| 10c | KLFALMTF10-2 | CAAGGAGGACTAGAGTGAGCAG | 22 | This study |
| 10c | KLFALMTR10-2 | AGGTCAGTTTGGCGTAAGCAG | 21 | This study |
| 11c | KLPASMTF11 | CCTCCTACAATGCTAAAAT | 19 |  |
| 11c | KLPASMTR11 | CTTTCACTTGGATTTGCACC | 20 |  |
| 12c | KLFALMTF12 | CTACTAACCGCCTCATACACC | 21 | This study |
| 12c | KLPASMTF12 | AAAACCTTCTTACCTGCCGA | 20 |  |
| 12c | KLPASMTR12 | CTTTTGAGTAGAATCCTGCT | 20 |  |
| 13c | KLFALMTF13 | TCCTACTCATCCGCACCCA | 19 | This study |
| 13c | KLFALMTR13 | TGTGTGGGCTACGGATGAG | 19 | This study |
| 14c | KLPASMTF14 | CCCACACCATCAAACATCTC | 20 |  |
| 14c | KLPASMTR14 | GGCTTACAAGACCAATG | 17 |  |

Note: a,b superscripts represent the primers for *A. fasciata* and *B. lagopus*, respectivelyandc indicates the conserved primers for both species.
