# Supplementary material for: The Mitochondrial Genomes of Aquila fasciata and Buteo lagopus (Aves, Accipitriformes): Sequence, Structure and Phylogenetic Analyses
Source: PLoS One. 2015 Aug 21;10(8):e0136297. doi: 10.1371/journal.pone.0136297 (PMC4546579; doi:10.1371/journal.pone.0136297)
Supplement: S2 Table — (XLS) [file pone.0136297.s002.xls]

## Sheet: Sheet1
S2 Table. GenBank accession numbers (MT-CYB, MT-ND2) for the 148 Accipitriformes species in this study.
	TAXON	MT-CYB	MT-ND2	Length
		GenBank	GenBank
	Accipiter bicolor	AY987307	AY987129	2022bp
	Accipiter cirrocephalus	EU583320	EU583259	2022bp
	Accipiter cooperii	AY987308	AY987130	2021bp
	Accipiter gentilis	NC_011818	NC_011818	2022bp
	Accipiter gularis	AY423066	EU583261	2022bp
	Accipiter nisus	NC_025580	NC_025580	2022bp
	Accipiter rufiventris	EU583324	EU583263	2022bp
	Accipiter striatus	U83305	KM875999	2022bp
	Accipiter virgatus	NC_026082	NC_026082	2022bp
	Aegypius monachus	X86739	AY987085	2022bp
	Aquila africana	AY987295	AY987117	2022bp
	Aquila audax	AJ604484	AY987124	2022bp
	Aquila chrysaetos	NC_024087	NC_024087	2022bp
	Aquila fasciata	KP329567	KP329567	2022bp
	Aquila gurneyi	AY987303	AY987125	2022bp
	Aquila heliaca	Z73465	AY987106	2022bp
	Aquila nipalensis	AJ604489	AY987108	2022bp
	Aquila rapax	AJ604491	AY987104	2022bp
	Aquila spilogaster	AJ604501	AY987121	2022bp
	Aquila verreauxii	AJ604492	AY987123	2022bp
	Busarellus nigricollis	GQ264810	GQ264896	2022bp
	Butastur indicus	EU583327	EU583266	2022bp
	Butastur rufipennis	EU583326	EU583265	2022bp
	Butastur teesa	EU583328	EU583267	1541bp
	Buteogallus aequinoctialis	GQ264770	EU583268	2022bp
	Buteogallus anthracinus	AY987327	AY987149	2022bp
	Buteogallus coronatus	AY987328	AY987150	2022bp
	Buteogallus lacernulatus	EU583359	EU583298	2022bp
	Buteogallus meridionalis	EU583330	EU583269	2022bp
	Buteogallus schistaceus	EU583372	EU583311	2022bp
	Buteogallus solitarius	AY987329	AY987151	2022bp
	Buteogallus urubitinga	EU583332	EU583271	2022bp
	Buteo albigula	EU583336	EU583275	2022bp
	Buteo albonotatus	GQ264775	GQ264861	2022bp
	Buteo augur	GQ264780	GQ264865	2022bp
	Buteo brachyurus	GQ264781	GQ264866	2022bp
	Buteo buteo	NC_003128	NC_003128	2022bp
	Buteo galapagoensis	AY870889	AY870891	1328bp
	Buteo jamaicensis	AY987334	AY987156	2022bp
	Buteo lagopus	KP337337	KP337337	2022bp
	Buteo lineatus	EU583337	EU583276	2022bp
	Buteo nitidus	GQ264794	GQ264880	2022bp
	Buteo oreophilus	EU583339	EU583278	2022bp
	Buteo platypterus	GQ264796	GQ264882	2022bp
	Buteo regalis	EU583344	EU583283	2022bp
	Buteo ridgwayi	GQ264800	GQ264886	2022bp
	Buteo rufinus	EU583343	EU583282	2022bp
	Buteo rufofuscus	EU583342	EU583281	2022bp
	Buteo solitarius	GQ264804	GQ264890	2022bp
	Buteo swainsoni	AY870890	AY870892	1328bp
	Chondrohierax uncinatus	AY987239	AY987058	2022bp
	Circaetus cinerascens	AY987257	AY987076	2022bp
	Circaetus cinereus	AY987254	AY987073	2022bp
	Circaetus fasciolatus	AY987256	AY987075	2022bp
	Circaetus gallicus	X86747	AY987072	2022bp
	Circaetus pectoralis	AY987252	AY987071	2022bp
	Circus aeruginosus	AY987305	AY987127	2018bp
	Circus ranivorus	AY987306	AY987128	2022bp
	Clanga clanga	Z73464	AY987105	1775bp
	Clanga hastata	AY987286	AY987107	1506bp
	Dryotriorchis spectabilis	AY987255	AY987074	2022bp
	Elanoides forficatus	AY987241	AY987060	2022bp
	Elanus leucurus	AY987233	AY987052	2022bp
	Eutriorchis astur	AY987238	AY987057	2022bp
	Geranoaetus albicaudatus	EU583333	EU583272	2022bp
	Geranoaetus melanoleucus	AY987332	AY987154	2022bp
	Geranoaetus polyosoma	EU583341	EU583280	2022bp
	Geranospiza caerulescens	AY987324	AY987146	2022bp
	Gypaetus barbatus	X86749	AY987056	2022bp
	Gypohierax angolensis	AY987236	AY987055	2022bp
	Gyps africanus	X86748	AY987082	2022bp
	Gyps bengalensis	AY987259	AY987078	2022bp
	Gyps coprotheres	X86751	AY987081	2022bp
	Gyps fulvus	X86752	AY987080	2022bp
	Gyps himalayensis	DQ908962	DQ908983	2022bp
	Gyps indicus	EU496439	DQ908989	2022bp
	Gyps rueppellii	AY987260	DQ908987	2022bp
	Gyps tenuirostris	DQ908960	DQ908981	2022bp
	Haliaeetus albicilla	AY987315	AY987137	2022bp
	Haliaeetus leucocephalus	GQ264818	AY987138	2022bp
	Haliaeetus leucogaster	AY987321	AY987143	2022bp
	Haliaeetus leucoryphus	Z73469	AY987135	2022bp
	Haliaeetus pelagicus	AY987314	AY987136	2022bp
	Haliaeetus sanfordi	AY987322	AY987144	2022bp
	Haliaeetus vocifer	AY987319	AY987141	2022bp
	Haliaeetus vociferoides	AY987320	AY987142	2022bp
	Haliastur indus	AY987309	AY987131	2022bp
	Haliastur sphenurus	AY994407	AY994450	2022bp
	Hamirostra melanosternon	AY987243	AY987062	2022bp
	Harpia harpyja	AJ604495	AY987090	2022bp
	Harpyopsis novaeguineae	AY987268	AY987087	2022bp
	Hieraaetus ayresii	AJ604497	AY987114	2022bp
	Hieraaetus morphnoides	AY754044	AY987112	2022bp
	Hieraaetus pennatus	AJ604500	AY987110	2022bp
	Hieraaetus wahlbergi	AJ604493	AY987115	2022bp
	Hieraaetus weiskei	AY987291	AY987113	2022bp
	Ichthyophaga humilis	AY987317	AY987139	2006bp
	Ichthyophaga ichthyaetus	AY987318	AY987140	2007bp
	Ictinaetus malayensis	AY754056	AY987109	2003bp
	Ictinia mississippiensis	EU583346	EU583285	2020bp
	Ictinia plumbea	AY987323	AY987145	2022bp
	Kaupifalco monogrammicus	EU583347	EU583286	2022bp
	Leptodon cayanensis	AY987240	AY987059	2022bp
	Leucopternis kuhli	AY987335	AY987157	2022bp
	Leucopternis melanops	AY987336	AY987158	2022bp
	Leucopternis semiplumbeus	GQ264846	EU583313	2022bp
	Lophaetus occipitalis	AJ604502	AY987103	2021bp
	Lophoictinia isura	AY987244	AY987063	2022bp
	Lophotriorchis kienerii	AY754054	AY987101	2022bp
	Melierax canorus	EU583377	EU583316	2022bp
	Melierax poliopterus	EU583378	EU583317	2022bp
	Micronisus gabar	AY987304	AY987126	2022bp
	Milvus migrans	AY994403	AY994446	2022bp
	Milvus milvus	AY994418	AY994460	2022bp
	Morphnarchus princeps	GQ264843	GQ264929	2022bp
	Morphnus guianensis	AJ604496	AY987088	2022bp
	Necrosyrtes monachus	AY987258	AY987077	2022bp
	Neophron percnopterus	U08942	AY987054	2001bp
	Nisaetus alboniger	NC_007599	NC_007599	2022bp
	Nisaetus lanceolatus	AY987271	AY987091	1829bp
	Nisaetus limnaeetus	AY987272	AY987092	2022bp
	Nisaetus nanus	AY987273	AY987093	2022bp
	Nisaetus nipalensis	NC_007598	NC_007598	2022bp
	Parabuteo leucorrhous	EU583334	EU583273	2022bp
	Parabuteo unicinctus	AY987331	AY987153	2022bp
	Pernis apivorus	X86758	AY987061	2022bp
	Pithecophaga jefferyi	AY987245	AY987064	2022bp
	Polemaetus bellicosus	AJ604504	AY987102	2022bp
	Polyboroides typus	AY987234	AY987053	2022bp
	Pseudastur albicollis	EU583348	EU583287	2022bp
	Pseudastur occidentalis	GQ264837	EU583302	2022bp
	Pseudastur polionotus	EU583368	EU583307	2022bp
	Rostrhamus sociabilis	AY987325	AY987147	2022bp
	Rupornis magnirostris	AY987330	AY987152	2022bp
	Sarcogyps calvus	X86759	AY987083	2022bp
	Spilornis cheela	NC_015887	NC_015887	2022bp
	Spilornis elgini	AY987248	AY987067	2022bp
	Spilornis holospilus	AY987249	AY987068	2022bp
	Spilornis rufipectus	AY987251	AY987070	2022bp
	Spizaetus isidori	AJ812238	AY987099	2022bp
	Spizaetus melanoleucus	AJ604505	AY987097	2021bp
	Spizaetus ornatus	AJ604508	AY987098	2022bp
	Spizaetus tyrannus	AJ604510	AY987096	2022bp
	Stephanoaetus coronatus	AJ604511	AY987100	2001bp
	Terathopius ecaudatus	AY987247	AY987066	2022bp
	Torgos tracheliotus	X86761	AY987086	2022bp
	Trigonoceps occipitalis	X86762	AY987084	2022bp
	Urotriorchis macrourus	EU583379	EU583318	2022bp
	Pandion haliaetus	NC_008550	NC_008550	2022bp
	Sagittarius serpentarius	NC_023788	NC_023788	2022bp
