# Supplementary material for: The Mitochondrial Genomes of Aquila fasciata and Buteo lagopus (Aves, Accipitriformes): Sequence, Structure and Phylogenetic Analyses
Source: PLoS One. 2015 Aug 21;10(8):e0136297. doi: 10.1371/journal.pone.0136297 (PMC4546579; doi:10.1371/journal.pone.0136297)
Supplement: S3 Table — (XLS) [file pone.0136297.s003.xls]

## Sheet: Table S1
S3 Table. GenBank accession numbers (MT-CYB, MT-ND2, MT-CO1, CR, RAG1, LDH, MYC, AK1 and FIB7) for 39 Aquilinae species in this study.
	TAXON	MT-CYB	MT-ND2	MT-CO1	CR	RAG1	LDH	MYC	AK1	FIB7	Length
		GenBank	GenBank	GenBank	GenBank	GenBank	GenBank	GenBank	GenBank	GenBank
	Aquila adalberti	Z73463	—	—	AJ937835	EU345533	—	—	—	—	2226 bp
	Aquila africana	AY987295	AY987117	—	EF459578	—	—	—	—	—	2262 bp
	Aquila audax	AJ604484	AY987124	—	EF459581	AJ601441	AJ601498	GU189446	AJ601469	—	6363 bp
	Aquila chrysaetos	NC_024087	NC_024087	NC_024087	NC_024087	EF078712	AJ601500	GU189447	AJ601470	AY987203	8023 bp
	Aquila fasciata	KP329567	KP329567	KP329567	KP329567	AJ601454	AJ601512	GU189455	AJ601483	—	7056 bp
	Aquila gurneyi	AY987303	AY987125	—	EF459582	—	—	—	—	—	2263 bp
	Aquila heliaca	Z73465	AY987106	DQ834322	AJ567367	AJ601444	AJ601502	GU189448	AJ601473	AY987198	7764 bp
	Aquila nipalensis	AJ604489	AY987108	DQ834326	AJ781268	AJ601445	AJ601503	GU189449	AJ601474	AY987199	7761 bp
	Aquila rapax	AJ604491	AY987104	—	—	AJ601447	AJ601505	GU189450	AJ601476	AY987197	7087 bp
	Aquila spilogaster	AJ604501	AY987121	—	—	AJ601457	AJ601515	—	AJ601486	AY987204	6002 bp
	Aquila verreauxii	AJ604492	AY987123	—	—	AJ601448	AJ601506	GU189451	AJ601477	AY987206	7087 bp
	Clanga clanga	Z73464	AY987105	EF515765	AJ875190	AJ601443	AJ601501	—	AJ601472	—	5728 bp
	Clanga hastata	AY987286	AY987107	—	—	—	—	—	—	—	1508 bp
	Clanga pomarina	Z73466	—	—	AJ875200	AJ601446	AJ601504	GU189452	AJ601475	—	5346 bp
	Hieraaetus ayresii	AJ604497	AY987114	—	EF459591	AJ601453	AJ601511	GU189454	AJ601482	—	6370 bp
	Hieraaetus morphnoides	AY754044	AY987112	—	—	EF078738	AJ601513	GU189456	AJ601484	AY987201	7095 bp
	Hieraaetus pennatus	AJ604500	AY987110	—	—	EU345536	AJ601514	GU189457	AJ601485	AY987200	6105 bp
	Hieraaetus wahlbergi	AJ604493	AY987115	—	—	AJ601449	AJ601507	GU189458	AJ601478	AY987202	7096 bp
	Hieraaetus weiskei	AY987291	AY987113	—	—	—	—	—	—	—	2026 bp
	Ictinaetus malayensis	AY754056	AY987109	—	EF459571	EF078739	—	—	—	—	4220 bp
	Lophaetus occipitalis	AJ604502	AY987103	—	EF459590	AJ601458	AJ601516	GU189453	AJ601487	AY987196	7332 bp
	Lophotriorchis kienerii	AY754054	AY987101	—	—	—	—	—	—	—	2026 bp
	Nisaetus alboniger	NC_007599	NC_007599	NC_007599	NC_007599	—	—	—	—	—	2957 bp
	Nisaetus bartelsi	EF459656	—	—	EF459549	—	—	—	—	—	501 bp
	Nisaetus cirrhatus	AJ604506	—	—	AY701069	AJ601462	AJ601520	GU189463	AJ601491	—	5366 bp
	Nisaetus floris	AY701118	—	—	AY701085	—	—	—	—	—	501 bp
	Nisaetus kelaarti	EF459647	—	—	EF459569	—	—	—	—	—	501 bp
	Nisaetus lanceolatus	AY987271	AY987091	—	AY701095	—	—	—	—	—	2070 bp
	Nisaetus limnaeetus	AY987272	AY987092	—	AY701071	—	—	—	—	—	2263 bp
	Nisaetus nanus	AY987273	AY987093	—	EF459552	—	—	—	—	—	2264 bp
	Nisaetus nipalensis	NC_007598	NC_007598	NC_007598	NC_007598	EF078759	AJ601521	GU189464	AJ601492	AY987189	8044 bp
	Nisaetus philippensis	AJ604509	—	HM639912	AY701090	AJ601465	AJ601523	—	AJ601494	—	4975 bp
	Nisaetus pinskeri	AY701125	—	—	AY701092	—	—	—	—	—	501 bp
	Polemaetus bellicosus	AJ604504	AY987102	—	—	EF078754	AJ601518	—	AJ601489	AY987195	6017 bp
	Spizaetus isidori	AJ812238	AY987099	—	EF459595	EF078751	AJ812241	—	AJ812240	AY987193	6182 bp
	Spizaetus melanoleucus	AJ604505	AY987097	JQ176244	—	AJ601461	AJ601519	GU189459	AJ601490	AY987191	7726 bp
	Spizaetus ornatus	AJ604508	AY987098	—	EF459594	AJ601464	AJ601522	GU189460	AJ601493	AY987192	7312 bp
	Spizaetus tyrannus	AJ604510	AY987096	JQ176245	EF459596	AJ601466	AJ601524	GU189461	AJ601495	AY987190	7966 bp
	Stephanoaetus coronatus	AJ604511	AY987100	—	EF459573	EF078762	AJ601525	GU189462	AJ601496	AY987194	7327 bp
	Harpia harpyja	AJ604495	AY987090	—	AF487685	EF078735	AJ601509	GU189444	AJ601480	AY987188	7306 bp
	Morphnus guianensis	AJ604496	AY987088	—	GQ917209	EF078748	AJ601510	GU189445	AJ601481	AY987187	7288 bp
